# Supplementary material for: Evolution with Reinforcement Learning in Negotiation
Source: PLoS One. 2014 Jul 21;9(7):e102840. doi: 10.1371/journal.pone.0102840 (PMC4105407; doi:10.1371/journal.pone.0102840)
Supplement: Table S1 — Variables and formulas. Average payoff of buyer, average payoff of seller, joint payoff, average round and fairness are calculated with the corresponding formulas. (DOCX) [file pone.0102840.s001.docx]

**Table S1.** Variables and formulas

| ***VARIALBLES*** | ***FORMULARS*** |
| --- | --- |
| Average payoff of buyer |  |
| Average payoff of seller |  |
| Joint payoff |  |
| Average round |  |
| Fairness |  |

Note: N is the negotiation amount, *i* the period, the round of a successful negotiation and the transaction price.
